# TABLE OF CONTENTS

# ANESTHESIOLOGY

|                                                  |     |
|--------------------------------------------------|-----|
| ◆ This Month in ANESTHESIOLOGY .....             | 1A  |
| Science, Medicine, and the Anesthesiologist..... | 15A |
| Infographics in Anesthesiology .....             | 19A |

## ◆ Editorial Views

### Reporting Laboratory and Animal Research in ANESTHESIOLOGY:

#### The Importance of Sex as a Biologic Variable

*L. Vutskits, J. D. Clark, E. D. Kharasch* .....949

#### Dexmedetomidine and the Upper Airway: Not as Simple as We Hoped

*D. S. Ward, S. B. Karan* .....953

#### Be Wary of Genes Governing Awareness

*P. G. Morgan, M. B. Kelz* .....955

#### Mission Impossible or Mission Futile? Estimating Penetrance for Malignant Hyperthermia

*M.-A. Shaw, P. M. Hopkins* .....957

#### Preoperative Assessment of Functional Capacity: Looking beyond the Ability to Climb Stairs

*D. N. Wijeyesundera* .....960

## Perioperative Medicine

### CLINICAL SCIENCE

#### ◆ ◆ Upper Airway Collapsibility during Dexmedetomidine and Propofol Sedation in Healthy Volunteers: A Nonblinded Randomized Crossover Study

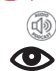

*Å. Lodenius, K. J. Maddison, B. K. Lawther, M. Scheinin, L. I. Eriksson, P. R. Eastwood, D. R. Hillman, M. J. Fagerlund, J. H. Walsh* .....962

At comparable levels of light to moderate sedation, dexmedetomidine and propofol exhibit similar degrees of pharyngeal collapsibility and reductions in ventilatory drive. The findings suggest that sedation with dexmedetomidine does not offer inherent protection against upper airway obstruction or ventilatory depression. *SUPPLEMENTAL DIGITAL CONTENT IS AVAILABLE IN THE TEXT*

#### ◆ ◆ Genetic Analysis of Patients Who Experienced Awareness with Recall while under General Anesthesia

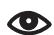

*J. W. Sleigh, K. Leslie, A. J. Davidson, D. J. Amor, P. Diakumis, V. Lukic, P. J. Lockhart, M. Bahlo* .....974

A preliminary study sought to determine whether there is evidence that awareness with recall is caused by a few rare variants with high penetrance in 12 patients who had experienced awareness with recall in the presence of apparently adequate anesthesia. Whole exome sequencing was conducted and identified variants were filtered and prioritized to identify a candidate list that might be suitable for further investigation of causes of awareness with recall. No candidate gene(s) suggestive of a monogenic etiology were identified, possibly because of the application of a filtering strategy, the small sample size, or use of exome sequencing, which does not interrogate potentially important regulatory noncoding sequences. *SUPPLEMENTAL DIGITAL CONTENT IS AVAILABLE IN THE TEXT*

#### ◆ ◆ An Assessment of Penetrance and Clinical Expression of Malignant Hyperthermia in Individuals Carrying Diagnostic Ryanodine Receptor 1 Gene Mutations

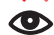

*C. A. Ibarra Moreno, S. Hu, N. Kraeva, F. Schuster, S. Johannsen, H. Rueffert, W. Klingler, L. Heytens, S. Riazzi* .....983

In a multicenter case-control study of 229 genotype-positive subjects with previous recorded exposure to trigger anesthetics, there were 93 malignant hyperthermia cases, for an overall penetrance for the analyzed *RYR1* mutations of 40.6%. The probability of developing malignant hyperthermia on exposure to triggers was 0.25 among all *RYR1* mutation carriers and 0.76 in survivors of malignant hyperthermia reactions (95% CI of the difference 0.41 to 0.59). Young age, male sex, and the use of succinylcholine were major nongenetic risk factors influencing expression of the *RYR1* mutations conferring malignant hyperthermia susceptibility.

◆ Refers to This Month in ANESTHESIOLOGY

◆ Refers to Editorial Views

This article has an Audio Podcast

See Supplemental Digital Content

CME Article

This article has a Video Abstract

Part of the Letheon writing competition

This article has a Visual Abstract

Readers' Toolbox

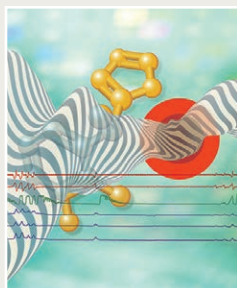

**ON THE COVER:** Dexmedetomidine is a sedative promoted as having minimal impact on ventilatory drive or upper airway muscle activity. However, more recent study has demonstrated impaired ventilatory drive and induction of apneas in sedated volunteers. In this issue of *ANESTHESIOLOGY*, Lodenius *et al.* measured upper airway collapsibility during dexmedetomidine sedation and related it to propofol. In an accompanying Editorial View, Ward and Karan review previous comparative studies with this new trial and conclude that light to moderate sedation with dexmedetomidine does not appear to offer any protection from central ventilatory apneas and airway obstructions over propofol. Cover illustration: A. Johnson, Vivo Visuals.

- Lodenius *et al.*: Upper Airway Collapsibility during Dexmedetomidine and Propofol Sedation in Healthy Volunteers: A Nonblinded Randomized Crossover Study, p. 962
- Ward and Karan: Dexmedetomidine and the Upper Airway: Not as Simple as We Hoped, p. 953



- ◆ **Accuracy of Physical Function Questions to Predict Moderate-Vigorous Physical Activity as Measured by Hip Accelerometry**  
D. S. Rubin, M. Huisingh-Scheetz, A. Hung, R. P. Ward,  
P. Nagele, R. Arena, D. Hedeker .....992

Results from standardized physical function questions and hip accelerometers were compared in 522 participants. Physical function questions were sensitive but nonspecific. Other approaches to assessing physical functional status should be considered. *SUPPLEMENTAL DIGITAL CONTENT IS AVAILABLE IN THE TEXT*

- ◆ **Pharmacodynamic Interaction of Remifentanyl and Dexmedetomidine on Depth of Sedation and Tolerance of Laryngoscopy**  
M. A. S. Weerink, C. R. M. Barends, E. R. R. Muskiet,  
K. M. E. M. Reynjens, F. H. Knotnerus, M. Oostra,  
J. F. P. van Bocklaer, M. M. R. F. Struys, P. J. Colin .....1004

This three-phase crossover trial to study the pharmacodynamic interaction between remifentanyl and dexmedetomidine in 30 age- and sex-stratified healthy volunteers found that, despite falling asleep, most subjects remained arousable by calling their name, shaking the subject while shouting their name, or a trapezius squeeze, even after reaching supraclinical concentrations. Adding remifentanyl to dexmedetomidine sedation did not affect the likelihood of response to graded stimuli. Dexmedetomidine potency increased with increasing age. *SUPPLEMENTAL DIGITAL CONTENT IS AVAILABLE IN THE TEXT*

- ◆ **Acoustic Shadowing Facilitates Ultrasound-guided Radial Artery Cannulation in Young Children**  
Z. Quan, L. Zhang, C. Zhou, P. Chi, H. He, Y. Li .....1018

This prospective, randomized trial in young children shows that a modified ultrasound-guided approach, using focused acoustic shadowing, results in a higher success rate and shorter cannulation time of the radial artery when compared with traditional ultrasound guidance.

- ◆ **A Population-based Comparative Effectiveness Study of Peripheral Nerve Blocks for Hip Fracture Surgery**  
G. M. Hamilton, M. M. Lal, R. Ramlogan, G. L. Bryson,  
F. W. Abdallah, C. J. L. McCartney, D. I. McIsaac .....1025

Among elderly patients undergoing emergency hip fracture surgery in Ontario, Canada, peripheral nerve blocks may be associated with slightly decreased postoperative lengths of stay and health system costs. The use of peripheral nerve blocks was not associated with a difference in postoperative pneumonia rates. *SUPPLEMENTAL DIGITAL CONTENT IS AVAILABLE IN THE TEXT*

- ◆ **Effect of a Cognitive Aid on Reducing Sugammadex Use and Associated Costs: A Time Series Analysis**  
D. M. Drzymalski, R. Schumann, F. J. Massaro,  
A. Trzcinka, R. J. Azocar .....1036

The investigators tested the hypothesis that a cognitive aid to guide selective use of sugammadex reduced use. They conducted a segmented regression (interrupted time series) retrospective analysis before and after implementing the cognitive aid and informational meetings for their department. Sugammadex use and associated costs, which were increasing, decreased substantially after introduction of the cognitive aid. *SUPPLEMENTAL DIGITAL CONTENT IS AVAILABLE IN THE TEXT*

- ◆ **Intraoperative Mechanical Ventilation and Postoperative Pulmonary Complications after Cardiac Surgery**  
M. R. Mathis, N. M. Duggal, D. S. Likosky, J. W. Haft, N. J. Douville,  
M. T. Vaughn, M. D. Maile, R. S. Blank, D. A. Colquhoun,  
R. J. Strobel, A. M. Janda, M. Zhang, S. Khetarpal,  
M. C. Engoren .....1046

In this retrospective analysis, the intraoperative ventilation bundle was associated with a lower rate of postoperative pulmonary complications. Lower modified driving pressure was independently associated with fewer pulmonary complications. *SUPPLEMENTAL DIGITAL CONTENT IS AVAILABLE IN THE TEXT*

## BASIC SCIENCE

- ◆ **Nitrous Oxide Impairs Axon Regeneration after Nervous System Injury in Male Rats**  
K. J. Stewart, B. J. Iskandar, B. M. Meier, E. B. Rizk,  
N. Hariharan, J. Koueik, A. -C. Andrei, K. J. Hogan .....1063

In *in vitro* and *in vivo* experimental models of male rats, nitrous oxide exposure impairs folic acid-induced axonal regeneration of dorsal root and retinal ganglion neurons. The beneficial effects of folic acid on functional recovery following spinal cord contusion in male rats are hindered by co-administration of nitrous oxide. These experiments suggest that nitrous oxide can interfere with axonal regeneration and functional recovery following central nervous system injury. *SUPPLEMENTAL DIGITAL CONTENT IS AVAILABLE IN THE TEXT*

- ◆ **Early Postnatal Exposure to Isoflurane Disrupts Oligodendrocyte Development and Myelin Formation in the Mouse Hippocampus**  
Q. Li, R. P. Mathena, J. Xu, O. N. Eregha, J. Wen, C. D. Mintz .....1077

Exposure of 7-day-old mouse pups to isoflurane (1.5%, 4 h) results in lasting impairments of oligodendrocyte proliferation and differentiation. These effects lead to defects in myelinations and are associated with cognitive dysfunction. The underlying molecular mechanisms involve the isoflurane-induced activation of the mammalian target of rapamycin pathway and a related decrease in DNA methylation in oligodendrocyte progenitors.



## Intergenerational Effects of Sevoflurane in Young Adult Rats

L.-S. Ju, J.-J. Yang, N. Xu, J. Li, T. E. Morey, N. Gravenstein,  
C. N. Seubert, B. Setlow, A. E. Martynyuk .....1092

Repeated exposures of adult rats to sevoflurane (2.1%, three times, 3 h on every second day) induce neurobehavioral abnormalities in the exposed males and in male but not female progeny. The neurobehavioral abnormalities in male offspring are accompanied by increased methylation and decreased expression of the potassium ion-chloride ion cotransporter Kcc2 gene that regulates neuronal chloride homeostasis, and, thereby, the functional modalities of  $\gamma$ -aminobutyric acid type A receptor-mediated neurotransmission. Sevoflurane exposure also induces hypermethylation of the Kcc2 gene in both male and female parental germ cells. These observations suggest that epigenetic reprogramming of parental germ cells is involved in transmitting the adverse effects of sevoflurane exposure of adult rats to their male progeny.

## Critical Care Medicine

### BASIC SCIENCE

#### Effect of Polyethylene-glycolated Carboxyhemoglobin on Renal Microcirculation in a Rat Model of Hemorrhagic Shock

P. Guerci, B. Ergin, A. Kapucu, M. P. Hilty, R. Jubin,  
J. Bakker, C. Ince .....1110

In a rat model of hemorrhagic shock, comparing fluid resuscitation with blood, diluted blood, hydroxyethyl starch, or polyethylene-glycolated carboxyhemoglobin, all fluids restored urine output and creatinine clearance, but only blood and diluted blood improved renal  $PO_2$ . Postresuscitation histologic renal tubular damage was increased compared with nonresuscitated rats but slightly less with blood, diluted blood, and polyethylene-glycolated carboxyhemoglobin compared with hydroxyethyl starch. Restoration of circulatory hemodynamics and kidney microcirculatory  $PO_2$  was comparable with polyethylene-glycolated carboxyhemoglobin and balanced hydroxyethyl starch solution. *SUPPLEMENTAL DIGITAL CONTENT IS AVAILABLE IN THE TEXT*

## Pain Medicine

### BASIC SCIENCE

#### Vascular Endothelial Growth Factor A Signaling Promotes Spinal Central Sensitization and Pain-related Behaviors in Female Rats with Bone Cancer

X.-M. Hu, W. Yang, L.-X. Du, W.-Q. Cui, W.-L. Mi, Q.-L. Mao-Ying,  
Y.-X. Chu, Y.-Q. Wang .....1125

In a female rat model of metastatic breast cancer, expression of vascular endothelial growth factor A and its receptor vascular endothelial growth factor receptor 2 were upregulated in spinal tissue. Blocking vascular endothelial growth factor signaling improved several measures of nociception and function in this model suggesting a role for vascular endothelial growth factor antagonists in reducing cancer-related pain. *SUPPLEMENTAL DIGITAL CONTENT IS AVAILABLE IN THE TEXT*

## Education

### IMAGES IN ANESTHESIOLOGY

#### The Lung Point: Early Identification of Pneumothorax on Point of Care Ultrasound

B. Fiza, V. Moll, N. Ferrero .....1148

*SUPPLEMENTAL DIGITAL CONTENT IS AVAILABLE IN THE TEXT*

#### Resection of an Adrenocortical Carcinoma Invading the Inferior Vena Cava Extending into the Right Ventricle

M. R. Abalo, J. Carey, O. Aljure, Y. F. Rodriguez Blanco .....1149

#### Pitfalls of a Shared Neuraxial Space: Wandering Epidural Catheter

R. A. Sunder, E. J. Monroe, S. H. Flack .....1151

#### Split Larynx

A. Bindra, S. Pathak, K. Sikka .....1152

### CLINICAL FOCUS REVIEW

#### Four-factor Prothrombin Complex Concentrate for the Management of Patients Receiving Direct Oral Activated Factor X Inhibitors

O. Grottke, S. Schulman .....1153

Factor Xa inhibitors prevent thrombosis but are associated with severe or life-threatening bleeding. Here, the authors present data on four-factor prothrombin complex concentrates in management of anticoagulation-associated bleeding and restoring hemostasis, including recent results from the UPRATE study.

### REVIEW ARTICLE

#### Transversus Abdominis Plane Block: A Narrative Review

D. Q. Tran, D. Bravo, P. Leurcharusmee, J. M. Neal .....1166

This narrative review article discusses the anatomy, history, nomenclature, approaches/techniques, pharmacology, indications, potential complications, and alternatives for transversus abdominis plane blocks.

### MIND TO MIND

#### My Brother's Ghost

R. Cabato .....1191

#### Bacchus Listed for a Liver Transplant

D. L. Hester .....1192

## Correspondence

#### Driving Pressure-guided Ventilation: Comment

M. A. Fierro .....1193

#### Driving Pressure-guided Ventilation: Comment

D. Amar .....1193



**Driving Pressure-guided Ventilation: Reply**

*M. Park, H. J. Ahn*.....1194

**Extracorporeal Membrane Oxygenation 1-yr Outcome: Comment**

*T. Phillips, R. J. Fink*.....1195

**Extracorporeal Membrane Oxygenation 1-yr Outcome: Reply**

*G. Grasselli, V. Scaravilli, D. Chiumello*.....1196

**Anesthesiology Reflections From The Wood Library-Museum**

**From Jerking Teeth to Clerking Harvard: Dr. Hiram Whitney and His Patients' Ethereal Requests**

*George S. Bause*.....1045

**Dr. Rudolph Matas: Surgeon, Author, and an American Pioneer of Spinal Anesthesia**

*George S. Bause*.....1062

**From Fixing Photos to Fixing Cyanide Poisoning: Herschel's "Hypo" or Sodium Thiosulfate**

*George S. Bause*.....1124

**Careers & Events .....21A**

**INSTRUCTIONS FOR AUTHORS**

The most recently updated version of the Instructions for Authors is available at [www.anesthesiology.org](http://www.anesthesiology.org). Please refer to the Instructions for the preparation of any material for submission to ANESTHESIOLOGY.

Manuscripts submitted for consideration for publication must be submitted in electronic format. The preferred method is via the Journal's Web site (<http://www.anesthesiology.org>). Detailed directions for submissions and the most recent version of the Instructions for Authors can be found on the Web site (<http://www.anesthesiology.org>). Books and educational materials should be sent to Alan Jay Schwartz, M.D., M.S.Ed., Director of Education, Department of Anesthesiology and Critical Care Medicine, The

Children's Hospital of Philadelphia, 34th Street and Civic Center Blvd., Room 9327, Philadelphia, Pennsylvania 19104-4399. Article-specific permission requests are managed with Copyright Clearance Center's Rightslink service. Information can be accessed directly from articles on the journal Web site. More information is available at <http://anesthesiology.pubs.asahq.org/public/rightsandpermissions.aspx>. For questions about the Rightslink service, e-mail [customer care@copyright.com](mailto:customer care@copyright.com) or call 877-622-5543 (U.S. only) or 978-777-9929. Advertising and related correspondence should be addressed to Advertising Manager, ANESTHESIOLOGY, Wolters Kluwer Health, Inc., Two Commerce Square, 2001 Market Street, Philadelphia, Pennsylvania 19103 (Web site: <http://www.wkcenter.com/>). Publication of an advertisement in ANESTHESIOLOGY does not constitute endorsement by the Society or Wolters Kluwer Health, Inc. of the product or service described therein or of any representations made by the advertiser with respect to the product or service.

**ANESTHESIOLOGY** (ISSN 0003-3022) is published monthly by Wolters Kluwer Health, Inc., 14700 Citicorp Drive, Bldg 3, Hagerstown, MD 21742. Business office: Two Commerce Square, 2001 Market Street, Philadelphia, PA 19103. Periodicals postage paid at Hagerstown, MD, and at additional mailing offices. Copyright © 2019, the American Society of Anesthesiologists, Inc. All Rights Reserved.

**Annual Subscription Rates:** *United States*—\$977 Individual, \$2249 Institution, \$393 In-training. *Rest of World*—\$1030 Individual, \$2497 Institution, \$393 In-training. Single copy rate \$230. Subscriptions outside of North America must add \$56 for airfreight delivery. Add state sales tax, where applicable. The GST tax of 7% must be added to all orders shipped to Canada (Wolters Kluwer Health, Inc.'s GST Identification #895524239, Publications Mail Agreement #1119672). Indicate in-training status and name of institution. Institution rates apply to libraries, hospitals, corporations, and partnerships of three or more individuals. Subscription prices outside the United States must be prepaid. Prices subject to change without notice. Subscriptions will begin with currently available issue unless otherwise requested. Visit us online at [www.lww.com](http://www.lww.com).

Individual and in-training subscription rates include print and access to the online version. Online-only subscriptions for individuals (\$323) and persons in training (\$323) are available to nonmembers and may be ordered by downloading a copy of the Online Subscription FAXback Form from the Web site, completing the information requested, and faxing the completed form to 301-223-2400. Institutional rates are for print only; online subscriptions are available via Ovid. Institutions can choose to purchase a print and online subscription together for a discounted rate. Institutions that wish to purchase a print subscription, please contact Wolters Kluwer Health, Inc., 14700 Citicorp Drive, Bldg 3, Hagerstown, MD 21742; phone: 800-638-3030; fax: 301-223-2400. Institutions

that wish to purchase an online subscription or online with print, please contact the Ovid Regional Sales Office near you or visit [www.ovid.com/site/index.jsp](http://www.ovid.com/site/index.jsp) and select Contact and Locations.

**Address for non-member subscription information, orders, or change of address** (except Japan): Wolters Kluwer Health, Inc., 14700 Citicorp Drive, Bldg 3, Hagerstown, MD 21742; phone: 800-638-3030; fax: 301-223-2400. In Japan, contact Wolters Kluwer Health Japan Co., Ltd., Foreca Mita Building 5th floor, 1-3-31 Mita Minato-ku, Tokyo, Japan 108-0073; phone: +81 3 5427 1969; e-mail: [journal@wkjapan.co.jp](mailto:journal@wkjapan.co.jp).

**Address for member subscription information, orders, or change of address:** Members of the American Society of Anesthesiologists receive the print and online journal with their membership. To become a member or provide a change of address, please contact the American Society of Anesthesiologists, 1061 American Lane, Schaumburg, Illinois 60173-4973; phone: 847-825-5586; fax: 847-825-1692; e-mail: [membership@ASAhq.org](mailto:membership@ASAhq.org). For all other membership inquiries, contact Wolters Kluwer Health, Inc., Customer Service Department, P.O. Box 1610, Hagerstown, MD 21740; phone: 800-638-3030; fax: 301-223-2400.

**Postmaster:** Send address changes to ANESTHESIOLOGY, P.O. BOX 1610, Hagerstown, MD 21740.

**Advertising:** Please contact Hilary Druker, Advertising Field Sales Representative, Health Learning, Research & Practice, Medical Journals, Wolters Kluwer Health, Inc.; phone: 609-304-9187; e-mail: [Hilary.Druker@wolterskluwer.com](mailto:Hilary.Druker@wolterskluwer.com). For classified advertising: Dave Wiegand, Recruitment Advertising Representative, Wolters Kluwer Health, Inc., Two Commerce Square, 2001 Market Street, Philadelphia, PA 19103; phone: 847-361-6128; e-mail: [Dave.Wiegand@wolterskluwer.com](mailto:Dave.Wiegand@wolterskluwer.com).
